# Supplementary material for: Theoretical investigation on CO oxidation catalyzed by a copper nanocluster
Source: Royal Society of Chemistry journal article supplement (doi:10.1039/c3ra41284a), 2013-01-01
Supplement: c3ra41284a.pdf [file c3ra41284a.pdf]

# Supporting Information

*for*

## **Theoretical Investigation on CO Oxidation Catalyzed by a Copper Nanocluster**

Dianyong Tang, and Jin Zhang\*

Chongqing Key Laboratory of Micro/Nano Materials Engineering and Technology, Research Centre  
for Materials Interdisciplinary Sciences, Chongqing University of Arts and Sciences, Chongqing,  
402168, P. R. China. E-mail: hxxzj2282@163.com

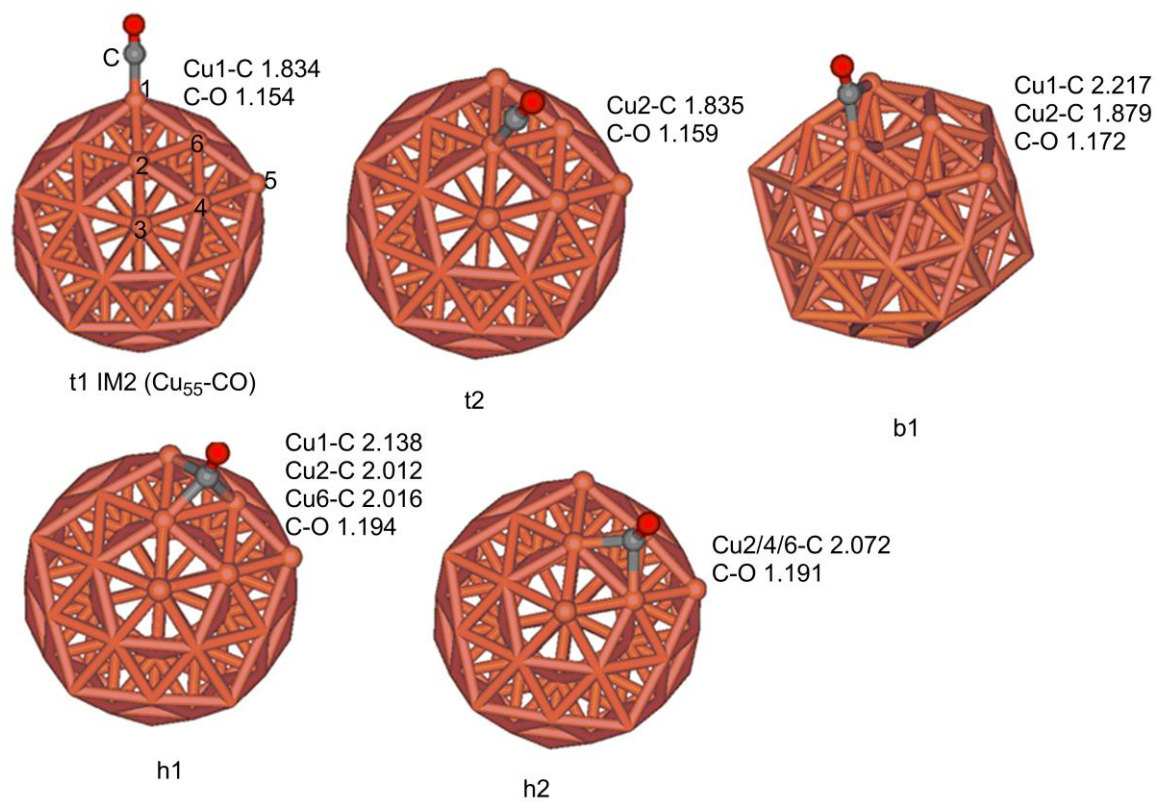

Fig. S1 The optimized structures and related parameters of CO adsorption on  $\text{Cu}_{55}$  cluster

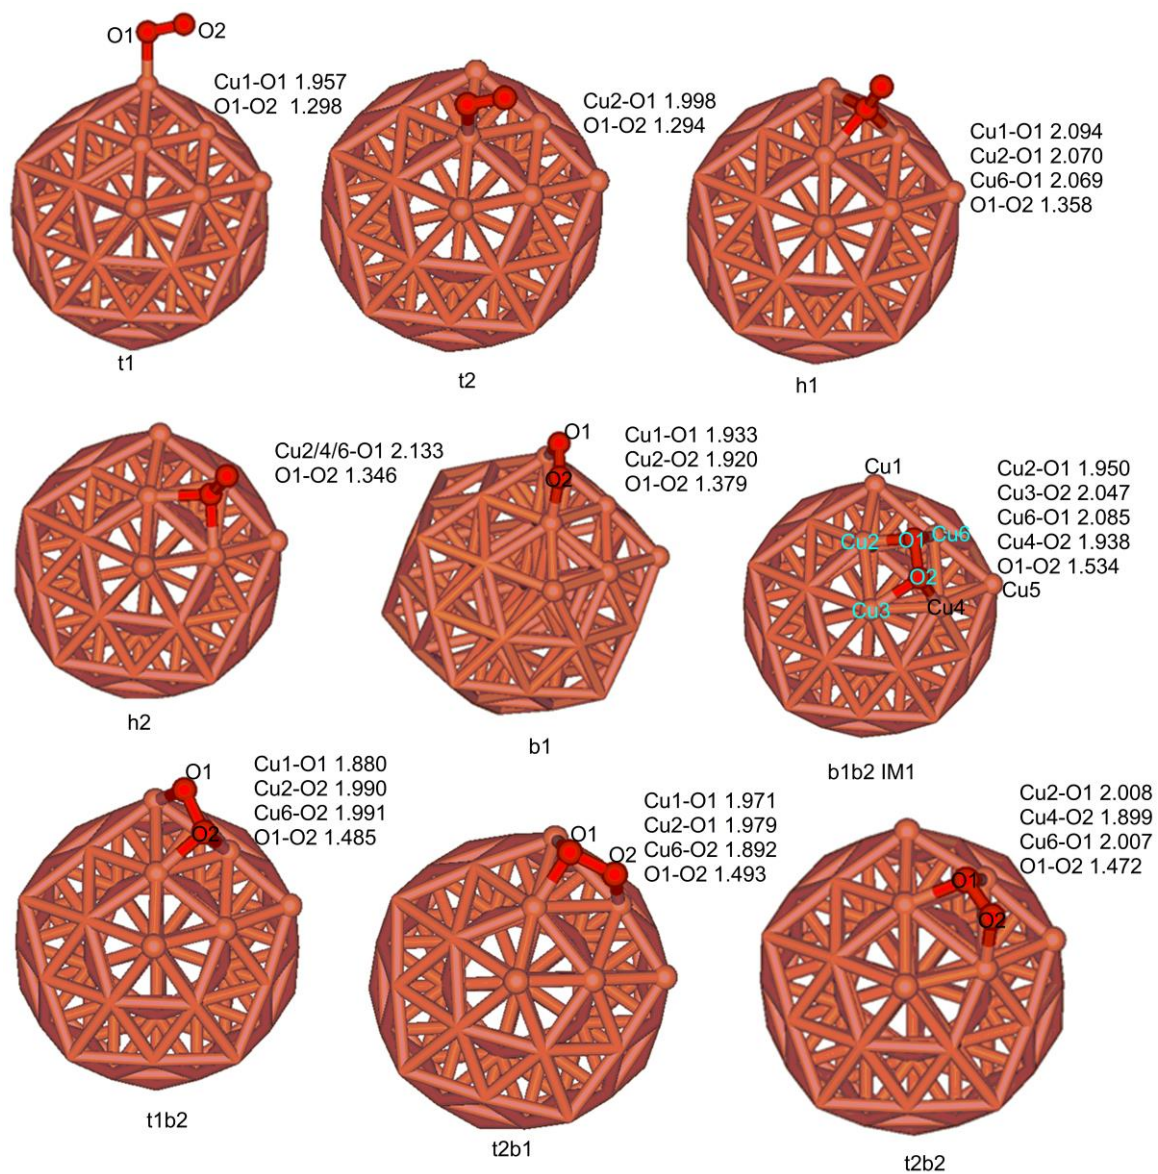

Fig. S2 The optimized structures and related parameters of O<sub>2</sub> adsorption on Cu<sub>55</sub> cluster
